# Supplementary material for: Identifying transcript 5′ capped ends in Plasmodium falciparum
Source: PeerJ journal article supplement (doi:10.7717/peerj.11983), 2021-08-25

Ring method1 enriched HiSeq

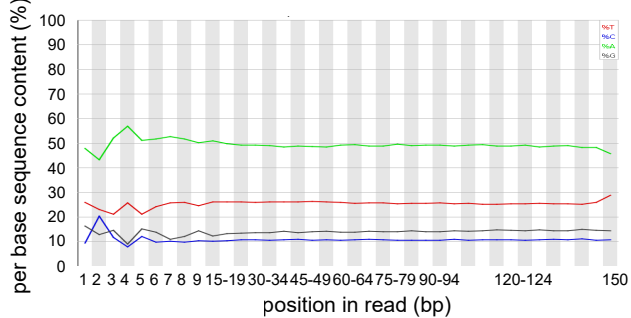

Trophozoite method1 enriched HiSeq

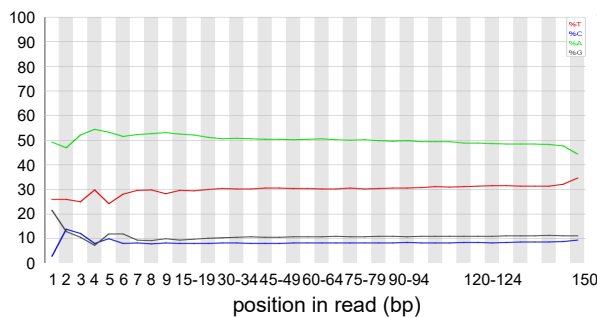

Schizont method1 enriched HiSeq

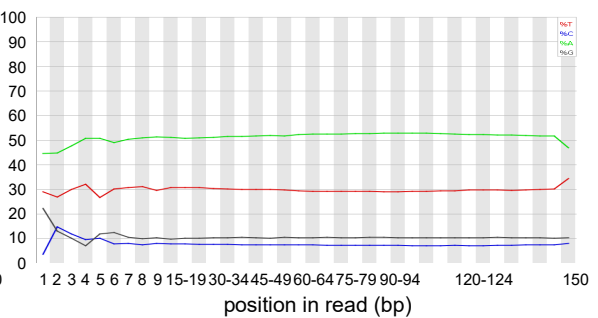

Ring method1 unenriched HiSeq

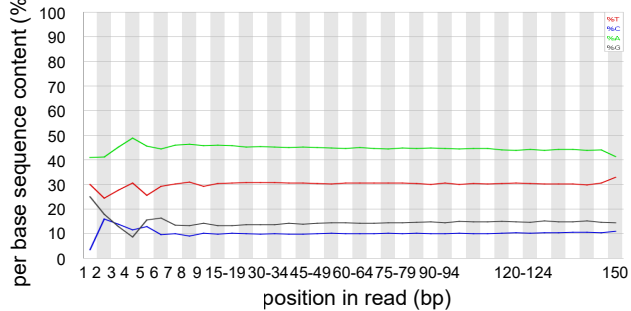

Trophozoite method1 unenriched HiSeq

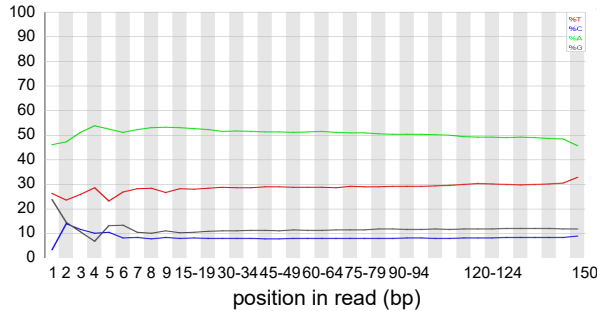

Schizont method1 unenriched HiSeq

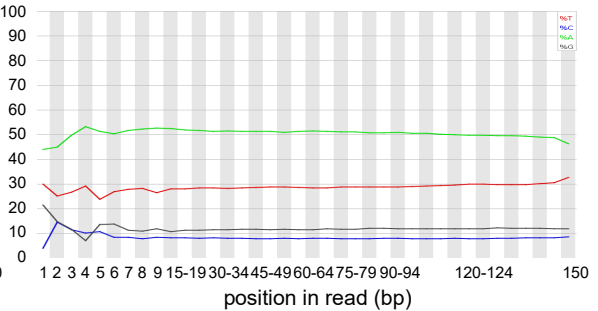

Ring method2 enriched HiSeq

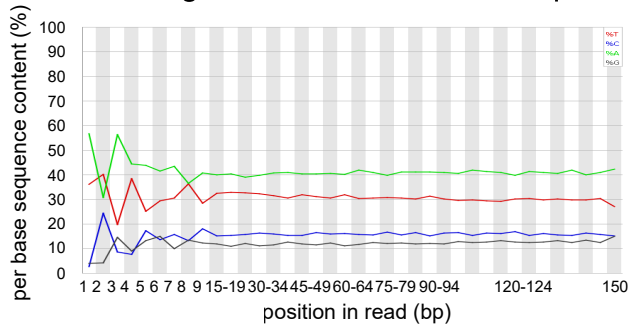

Trophozoite method2 enriched HiSeq

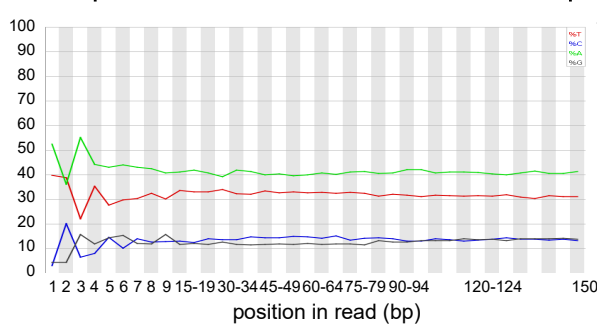

Schizont method2 enriched HiSeq

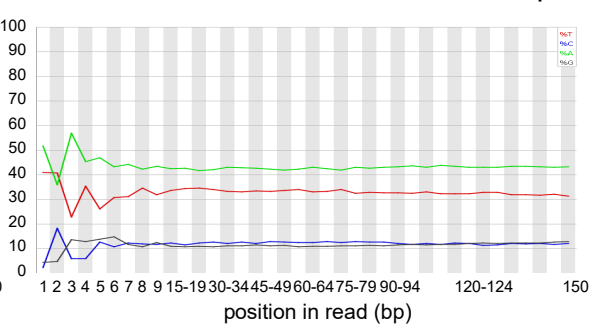

Ring method2 unenriched HiSeq

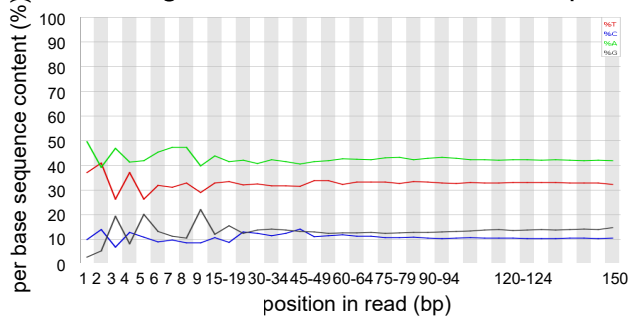

Trophozoite method2 unenriched HiSeq

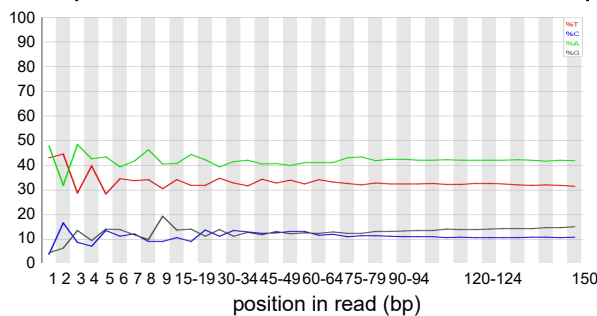

Schizont method2 unenriched HiSeq

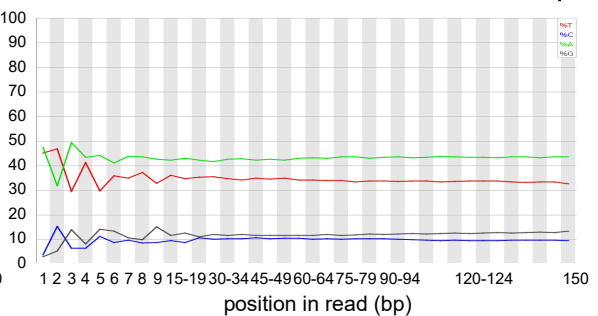

Supplement: FigS1.pdf [file FigS1.pdf]
