# Supplementary material for: Identifying transcript 5′ capped ends in Plasmodium falciparum
Source: PeerJ journal article supplement (doi:10.7717/peerj.11983), 2021-08-25

Ring method1 enriched MiSeq

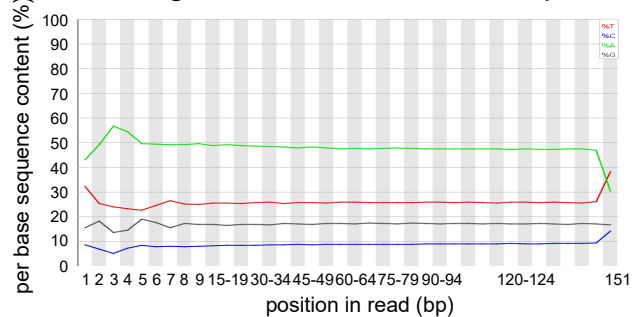

Trophozoite method1 enriched MiSeq

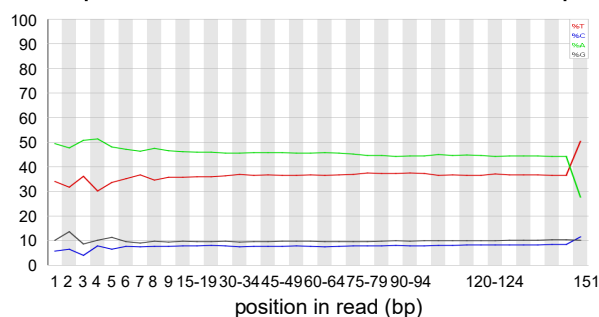

Schizont method1 enriched MiSeq

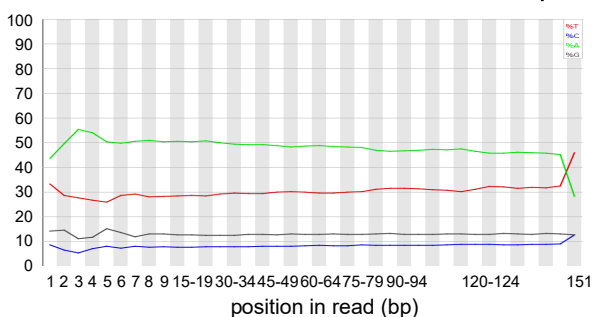

Ring method1 unenriched MiSeq

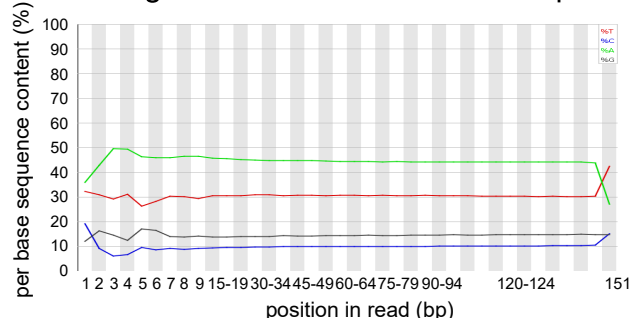

Trophozoite method1 unenriched MiSeq

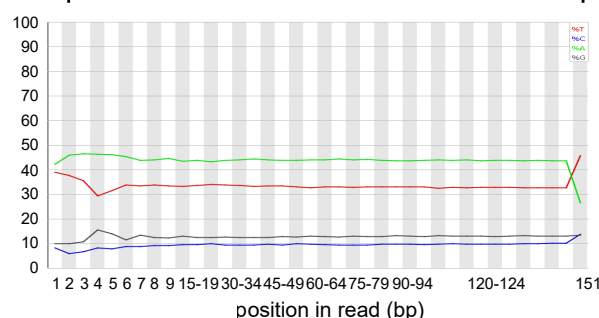

Schizont method1 unenriched MiSeq

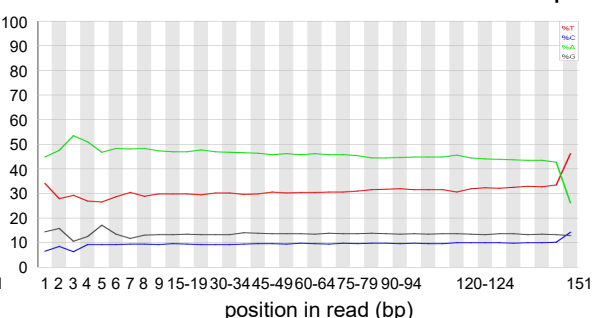

Ring method2 enriched MiSeq

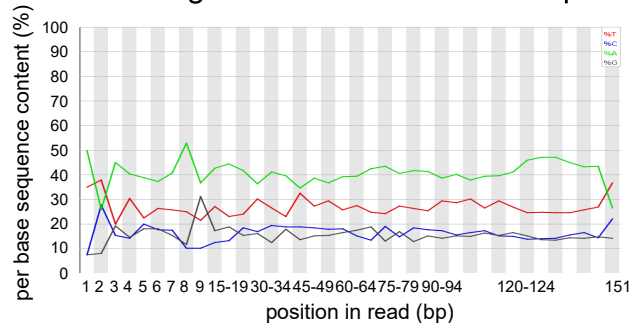

Trophozoite method2 enriched MiSeq

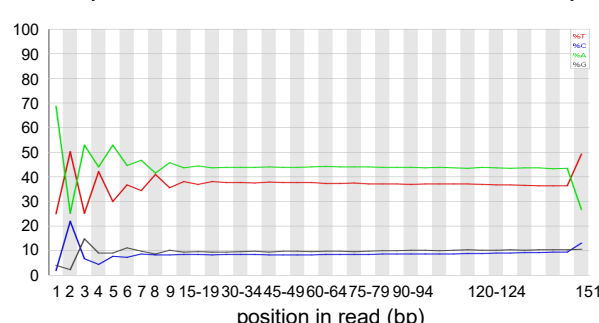

Schizont method2 enriched MiSeq

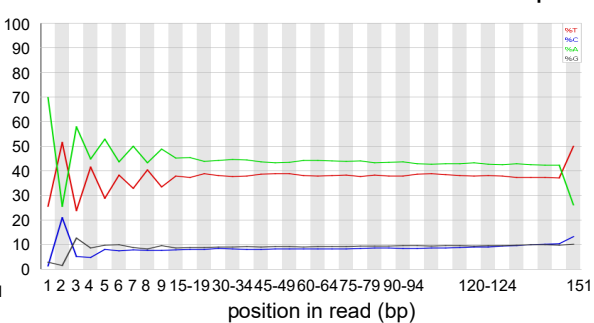

Ring method2 unenriched MiSeq

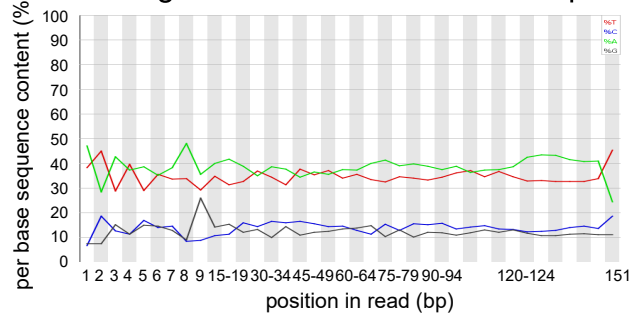

Trophozoite method2 unenriched MiSeq

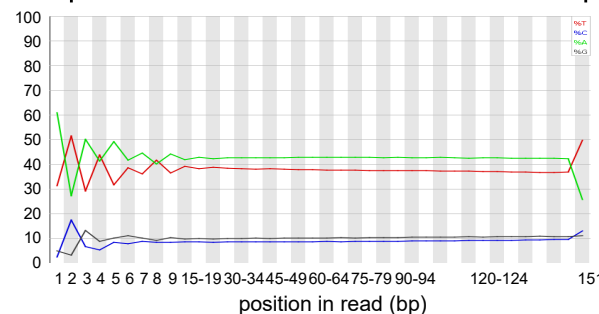

Schizont method2 unenriched MiSeq

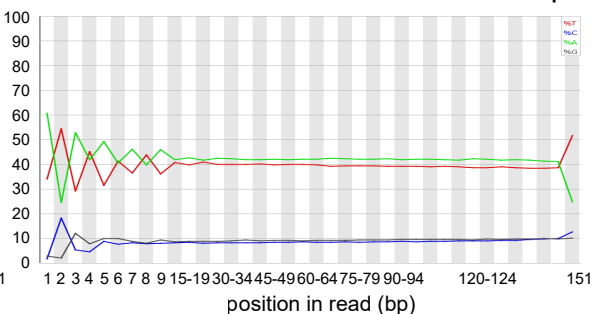

Supplement: FigS2.pdf [file FigS2.pdf]
